# Supplementary material for: New digital models of care in ophthalmology, during and beyond the COVID-19 pandemic
Source: PubMed Central journal article supplement — Br J Ophthalmol. 2021 Mar 22;106(4):452–7. doi: 10.1136/bjophthalmol-2020-317683 (PMC8961770; doi:10.1136/bjophthalmol-2020-317683), 2021-03-22
Supplement: bjophthalmol-2020-317683supp001.pdf [file bjophthalmol-2020-317683supp001.pdf]

## **Appendix A.**

### **Search Strategy.**

#### Pubmed Search Strategy

1. (((((((("wuhan"[All Fields] AND ("coronavirus"[MeSH Terms] OR "coronavirus"[All Fields])) AND 2019/12/1:2030/12/31[Date - Publication]) OR ("severe acute respiratory syndrome coronavirus 2"[Supplementary Concept] OR "severe acute respiratory syndrome coronavirus 2"[All Fields] OR "2019 ncov"[All Fields]) OR "2019nCoV"[All Fields] OR (((((((("covid 19"[All Fields] OR "covid 2019"[All Fields]) OR "severe acute respiratory syndrome coronavirus 2"[Supplementary Concept]) OR "severe acute respiratory syndrome coronavirus 2"[All Fields] OR "2019 ncov"[All Fields] OR "sars cov 2"[All Fields]) OR "2019nCoV"[All Fields] OR ("wuhan"[All Fields] AND ("coronavirus"[MeSH Terms] OR "coronavirus"[All Fields])) AND (2019/12/1:2019/12/31[Date - Publication] OR 2020/1/1:2020/12/31[Date - Publication]))) OR ("severe acute respiratory syndrome coronavirus 2"[Supplementary Concept] OR "severe acute respiratory syndrome coronavirus 2"[All Fields] OR "sars cov 2"[All Fields]) AND (((("ophthalmologie"[All Fields] OR "ophthalmology"[MeSH Terms] OR "ophthalmology"[All Fields] OR "ophthalmology s"[All Fields])) AND "digital"[All Fields]

2. (((((((("wuhan"[All Fields] AND ("coronavirus"[MeSH Terms] OR "coronavirus"[All Fields])) AND 2019/12/1:2030/12/31[Date - Publication]) OR ("severe acute respiratory syndrome coronavirus 2"[Supplementary Concept] OR "severe acute respiratory syndrome coronavirus 2"[All Fields] OR "2019 ncov"[All Fields]) OR "2019nCoV"[All Fields] OR (((((((("covid 19"[All Fields] OR "covid 2019"[All Fields]) OR "severe acute respiratory syndrome coronavirus 2"[Supplementary Concept]) OR "severe acute respiratory syndrome coronavirus 2"[All Fields] OR "2019 ncov"[All Fields] OR "sars cov 2"[All Fields]) OR "2019nCoV"[All Fields] OR ("wuhan"[All Fields] AND ("coronavirus"[MeSH Terms] OR "coronavirus"[All Fields])) AND (2019/12/1:2019/12/31[Date - Publication] OR 2020/1/1:2020/12/31[Date - Publication]))) OR ("severe acute respiratory syndrome coronavirus 2"[Supplementary Concept] OR "severe acute respiratory syndrome coronavirus 2"[All Fields] OR "sars cov 2"[All Fields]) AND (((("ophthalmologie"[All Fields] OR "ophthalmology"[MeSH Terms] OR "ophthalmology"[All Fields] OR "ophthalmology s"[All Fields])) AND "tele"[All Fields]

3. Limited to English [lang]

Final Pubmed search term:

(1 OR 2) AND (3).

Search results (last search on 20<sup>th</sup> July 2020):

After excluding irrelevant 2 articles, the final search yielded 14 results, of which, 9 were brief reports/ commentaries, 3 were review articles, 1 was a guideline report on tele-consultation, and only 1 original research article (survey research on acceptance and barriers to telehealth). The full list of articles are listed as follow.

1: Khor WB, Yip L, Zhao P, Foo VHX, Lim L, Ting DSW, Loon SC, Wong E, Yong V, Tan C, Wong TY, Wong HT. Evolving Practice Patterns in Singapore's Public Sector Ophthalmology Centers During the COVID-19 Pandemic. *Asia Pac J Ophthalmol* (Phila). 2020 Jul 10. Epub ahead of print.

2: Parikh D, Armstrong G, Liou V, Husain D. Advances in Telemedicine in Ophthalmology. *Semin Ophthalmol*. 2020 Jul 9:1-6. Epub ahead of print.

3: Moss HE, Lai KE, Ko MW. Survey of Telehealth Adoption by Neuro-ophthalmologists During the COVID-19 Pandemic: Benefits, Barriers and Utility. *J Neuroophthalmol*. 2020 Jun 30. Epub ahead of print. PMID: 32639269.

4: Gupta PC, Kumar MP, Ram J. COVID-19 pandemic from an ophthalmology point of view. *Indian J Med Res*. 2020 May;151(5):411-418.

5: Lai KE, Ko MW, Rucker JC, Odel JG, Sun LD, Wings KM, Ghosh A, Bindiganavile SH, Bhat N, Wendt SP, Scharf JM, Dinkin MJ, Rasool N, Galetta SL, Lee AG. Tele-Neuro-Ophthalmology During the Age of COVID-19. *J Neuroophthalmol*. 2020 Jun 25. Epub ahead of print.

6: Ko M, Busis NA. Tele-Neuro-Ophthalmology: Vision for 20/20 and Beyond. *J Neuroophthalmol*. 2020 Jun 26. Epub ahead of print.

7: Deshmukh AV, Badakere A, Sheth J, Bhate M, Kulkarni S, Kekunnaya R. Pivoting to teleconsultation for paediatric ophthalmology and strabismus: Our experience during COVID-19 times. *Indian J Ophthalmol*. 2020 Jul;68(7):1387-1391.

8: Sharma M, Jain N, Ranganathan S, Sharma N, Honavar SG, Sharma N, Sachdev MS. Tele-ophthalmology: Need of the hour. *Indian J Ophthalmol*. 2020 Jul;68(7):1328-1338.

9: Jayadev C, Mahendradas P, Vinekar A, Kemmanu V, Gupta R, Pradhan ZS, D'Souza S, Aroor CD, Kaweri L, Shetty R, Honavar SG, Shetty B. Tele-consultations in the wake of COVID-19 - Suggested guidelines for clinical ophthalmology. *Indian J Ophthalmol*. 2020 Jul;68(7):1316-1327.

10: Bhaskaran K, Sharma P. Distancing? But still I-care: Tele-ophthalmology during COVID-19 era. *Indian J Ophthalmol*. 2020 Jul;68(7):1243-1244.

11: Wong JKW, Shih KC, Chan JCH, Lai JSM. Tele-ophthalmology amid COVID-19 pandemic-Hong Kong experience. *Graefes Arch Clin Exp Ophthalmol*. 2020 May 29:1. Epub ahead of print.

12: Das AV, Rani PK, Vaddavalli PK. Tele-consultations and electronic medical records driven remote patient care: Responding to the COVID-19 lockdown in India. *Indian J Ophthalmol*. 2020 Jun;68(6):1007-1012.

13: Saedon H, Gould G, Begum M, Aslam TM. Video Conferencing in the Intravitreal Injection Clinic in Response to the COVID-19 Pandemic. *Ophthalmol Ther*. 2020 May 25:1–6. Epub ahead of print.

14: Bowe T, Hunter DG, Mantagos IS, Kazlas M, Jastrzembski BG, Gaier ED, Massey G, Franz K, Schumann C, Brown C, Meyers H, Shah AS. Virtual Visits in Ophthalmology: Timely Advice for Implementation During the COVID-19 Public Health Crisis. *Telemed J E Health*. 2020 May 14. Epub ahead of print.
